# Supplementary material for: Comparison of COVID-19 Resilience Index and Its Associated Factors across 29 Countries during the Delta and Omicron Variant Periods
Source: MDPI journal article supplement (doi:10.3390/vaccines10060940), 2022-06-13
Supplement: s1 [file s1]

## **Supplemental material**

### **Comparison of COVID-19 Resilience Index and Its Associated Factors Across 29 Countries During the Delta and Omicron Variants Periods**

#### **Table of Contents**

|                                                                                                                              |    |
|------------------------------------------------------------------------------------------------------------------------------|----|
| 1. Model formulas for longitudinal analysis.....                                                                             | 4  |
| 2. Model selection procedure and testing assumptions of model.....                                                           | 4  |
| 2.1. Delta variant dominant period.....                                                                                      | 5  |
| 2.2. Omicron variant dominant period .....                                                                                   | 8  |
| 3. Variables and data sources .....                                                                                          | 12 |
| 4. Study period.....                                                                                                         | 14 |
| 5. Vaccination, stringency index and resilience index .....                                                                  | 15 |
| 6. Unstandardized average number of Hospitalization, ICU and mortality rate throughout<br>the Delta and Omicron period ..... | 21 |

## **List of Tables**

|                                                                                                                                                                                                    |    |
|----------------------------------------------------------------------------------------------------------------------------------------------------------------------------------------------------|----|
| Table S1. Univariate model results and sequence in which covariate were added in the forward selection multivariable linear mixed model during Delta variant dominant period .....                 | 5  |
| Table S2. The final model of multivariable linear mixed effect model in Delta variant dominant period.....                                                                                         | 6  |
| Table S3. The variance inflation factor (VIF) for covariates in the mLME during Delta variant dominant period.....                                                                                 | 8  |
| Table S4. Univariate model results and sequence in which covariates were added in the forward selection multivariable linear mixed effect model (mLME) during Omicron variant dominant period..... | 8  |
| Table S5. The final model of multivariable linear mixed effect model in Omicron variant dominant period.....                                                                                       | 10 |
| Table S6. The variance inflation factor (VIF) for covariates in the mLME during Omicron variant dominant period .....                                                                              | 12 |
| Table S7. List of variables and their data sources .....                                                                                                                                           | 12 |
| Table S8. The study period of countries during Delta variant and Omicron variant period .....                                                                                                      | 14 |
| Table S9. The variation of stringency index in 29 countries during the first eight weeks of the Delta period .....                                                                                 | 15 |
| Table S10. The variation of stringency index in 29 countries during the first eight weeks of the Omicron period.....                                                                               | 16 |
| Table S11. The percentage of population fully vaccinated in 29 countries during the first eight weeks of the Delta period .....                                                                    | 17 |
| Table S12. The percentage of population fully vaccinated in 29 countries during the first eight weeks of the Omicron period .....                                                                  | 18 |
| Table S13. The variation of standardized resilience index in 29 countries during the first eight weeks of the Delta period .....                                                                   | 19 |
| Table S14. The variation of standardized resilience index in 29 countries during the first eight weeks of the Omicron period .....                                                                 | 20 |
| Table S15. The unstandardized average number of daily hospital occupancy, daily ICU occupancy and mortality rate per 100000 inhabitants.....                                                       | 21 |

## **List of Figures**

|                                                                                                                                                                                       |    |
|---------------------------------------------------------------------------------------------------------------------------------------------------------------------------------------|----|
| Figure S1. The residuals across all countries and over the time for the mLME during Delta variant dominant period .....                                                               | 7  |
| Figure S2. The residuals in the intercepts and slopes across countries and in the between-country intercept and slope residuals for mLME during Delta variant dominant period. ..     | 8  |
| Figure S3. The residuals across all countries and over the time for the mLME during Omicron variant dominant period. ....                                                             | 11 |
| Figure S4. The residuals in the intercepts and slopes across countries and in the between-country intercept and slope residuals for mLME during Omicron variant dominant period. .... | 12 |

## 1. Model formulas for longitudinal analysis

$$Y_{i,t} = \beta_0 + (\alpha + \alpha_i)T_{i,t} + \sum_{j=1}^n \beta_j X_{ij,t} + (\theta_0 P_{i,t}) + (\delta_0 V_{i,t}) + b_i + \varepsilon_{i,t}$$

Our interest outcome  $Y_{i,t}$  is the log transformation of resilience index (r index) in the country  $i$  on the week  $t$ .

The corresponding independent variables that were classified into three equal group and significantly associated with outcome variable in univariate analysis are denoted by  $X_{ij,t}$  ( $j=1, \dots, n$  with  $n$  – number of selected independent variables by the forward selection approach) their fixed effects are captured by  $\beta_j$ .

$P_{i,t}$  is the categorical variable (tertiles) for 14-day lag stringency index of country  $i$  on week  $t$ . Their fixed effect is captured by  $\theta_0$ .

$V_{i,t}$  is the categorical variable (tertiles) for 40-day lag of percentage of population fully vaccinated in country  $i$  on week  $t$ . The effects of vaccination coverage is captured via the fixed effect  $\delta_0$ .

The time of NPI implementation (measured by stringency index) or vaccination is denoted by  $T_{i,t}$  and its effect is captured via fixed effect  $\alpha$ .

The random intercept model was used because it enabled each country to have its own linear regression function with different intercept (corresponding to fixed intercept  $\beta_0$ ). Country-specific random slopes for week  $T_{i,t}$  might be important if the resilience index has varied by different weeks. Therefore, we extended the mixed models that allows the country-specific random slopes for week effect  $T_{i,t}$  with a random effect  $\alpha_i$ . Our model parameters are estimated via maximum likelihood (ML) approach.

The country-specific impact was captured via the random effect  $b_i \sim N(0, D)$ .  $\varepsilon_{i,t} \sim N(0, \sigma_e^2)$  was the country and week specific residual error.

$D$  is the variance-covariance matrix for the intercept and slope pertaining to the outcome  $Y$ .

## 2. Model selection procedure and testing assumptions of model

According to forward selection approach, the steps to select the final model include:

Step 1: The univariate analysis linear mixed effect models were conducted with time and each covariate (stringency index, percentage of population fully vaccinated, independent variables) as predictors

Step 2: We selected all the covariates which had significant value (p value <0.05) in the univariate analyses.

Step 3: We ranked the selected covariate in the decreasing order according to the goodness of fit of the univariate models as defined by Bayesian Information Criterion (BIC).

Step 4: We fitted a series of multivariable forward selection linear mixed models with time and inputted each covariate sequentially based on its rank. If an individual variable was an insignificant predictor, it was dropped from the forward selection models.

Step 5: After achieving the final model for linear mixed effect model, we fitted the generalized linear mixed model with the similar covariates.

## 2.1. Delta variant dominant period

### 2.1.1. Model selection of the multivariable linear mixed effect model (mLME) during Delta variant dominant period

We identified the significant covariates using the univariate analysis. Table S1 show the selected covariates were ranked in decreasing order of good of fitness based on their BIC values.

Table S1. Univariate model results and sequence in which covariate were added in the forward selection multivariable linear mixed model during Delta variant dominant period

| Rank | Covariates                                     | Coefficient | p value | BIC     |
|------|------------------------------------------------|-------------|---------|---------|
| 1    | Intercept                                      | -3.655      | 0.000   | 191.696 |
|      | Percentage of population fully vaccinated (T2) | -0.294      | 0.000   |         |
|      | Percentage of population fully vaccinated (T3) | -0.221      | 0.042   |         |
|      | Time                                           | 0.163       | 0.000   |         |
| 2    | Intercept                                      | -3.87       | 0.000   | 199.017 |
|      | Stringency index (T2)                          | 0.072       | 0.414   |         |
|      | Stringency index (T3)                          | 0.272       | 0.006   |         |
|      | Time                                           | 0.148       | 0.000   |         |
| 3    | Intercept                                      | -3.166      | 0.000   | 201.929 |
|      | Regulatory Quality (T2)                        | -0.504      | 0.13    |         |
|      | Regulatory Quality (T3)                        | -1.243      | 0.000   |         |
|      | Time                                           | 0.147       | 0.000   |         |
| 4    | Intercept                                      | -3.335      | 0.000   | 207.985 |
|      | Rule of Law (T2)                               | -0.323      | 0.376   |         |
|      | Rule of Law (T3)                               | -0.916      | 0.014   |         |
|      | Time                                           | 0.147       | 0.000   |         |
| 5    | Intercept                                      | -3.231      | 0.000   | 208.449 |

|   |                                      |        |       |         |
|---|--------------------------------------|--------|-------|---------|
|   | No. Nurses per 1000 inhabitants (T2) | -0.831 | 0.029 |         |
|   | No. Nurses per 1000 inhabitants (T3) | -0.76  | 0.039 |         |
|   | Time                                 | 0.147  | 0.000 |         |
| 6 | Intercept                            | -3.491 | 0.000 | 208.780 |
|   | Government Effectiveness (T2)        | 0.004  | 0.991 |         |
|   | Government Effectiveness (T3)        | -0.76  | 0.041 |         |
|   | Time                                 | 0.147  | 0.000 |         |
| 7 | Intercept                            | -4.175 | 0.000 | 209.133 |
|   | Population (T2)                      | 0.41   | 0.272 |         |
|   | Population (T3)                      | 0.859  | 0.023 |         |
|   | Time                                 | 0.147  | 0.000 |         |

Table S2 presents the multivariable linear mixed effect model (mLME) which includes the significant covariates selected from the forward selection during Delta variant dominant period.

Table S2. The final model of multivariable linear mixed effect model in Delta variant dominant period

| Covariates                                       | Coefficient | p values | Lower bound | Upper bound |
|--------------------------------------------------|-------------|----------|-------------|-------------|
| Intercept                                        | -3.620      | 0.000    | -4.312      | -2.928      |
| Medium level -% population fully vaccinated (T2) | -0.300      | 0.000    | -0.433      | -0.167      |
| High level -% population fully vaccinated (T3)   | -0.233      | 0.033    | -0.447      | -0.019      |
| Medium level - Rule of Law (T2)                  | -0.279      | 0.447    | -1.023      | 0.465       |
| High level - Rule of Law (T3)                    | -0.892      | 0.018    | -1.620      | -0.164      |
| Medium level - Population (T2)                   | 0.350       | 0.341    | -0.394      | 1.094       |
| Medium level - Population (T3)                   | 0.730       | 0.049    | 0.003       | 1.456       |
| Time                                             | 0.164       | 0.000    | 0.122       | 0.206       |
| BIC                                              | 218.844     |          |             |             |
| R2 Conditional                                   | 0.957       |          |             |             |
| R2 Marginal                                      | 0.344       |          |             |             |

### 2.1.2. Testing the assumption of the mLME during Delta variant dominant period

- Normality in the distribution of the residuals

To examine the normality of residual distribution, we plotted the residuals across all countries and over time in figure S1; and the residuals in the intercepts and slopes across countries and the between-country intercept and slope residuals during the Delta variant dominant period in figure S2.

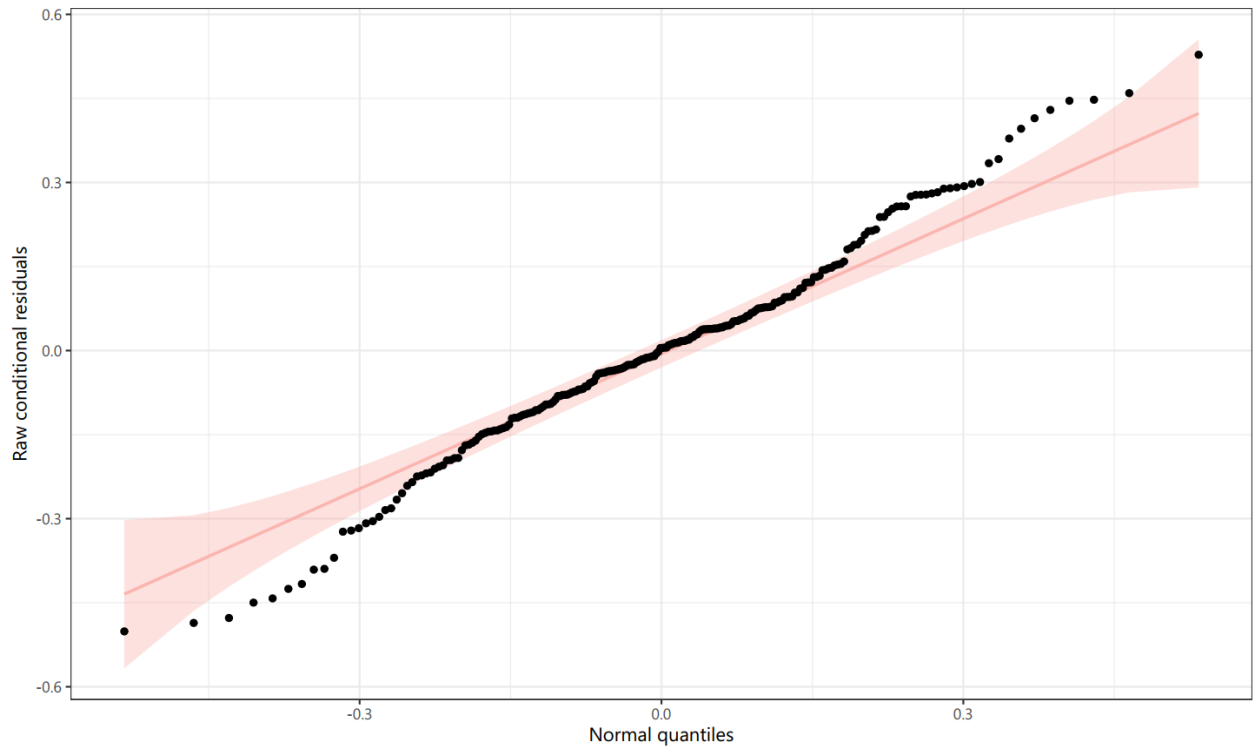

Figure S1. The residuals across all countries and over the time for the mLME during Delta variant dominant period

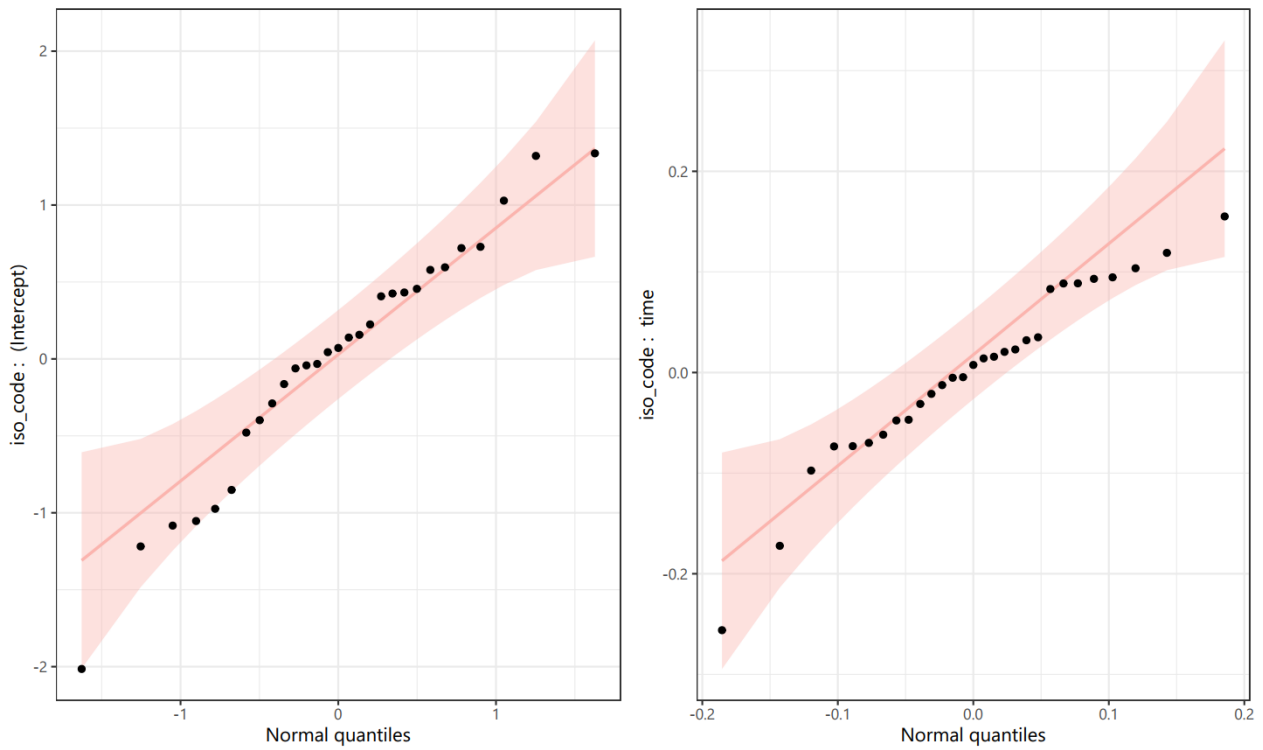

Figure S2. The residuals in the intercepts and slopes across countries and in the between-country intercept and slope residuals for mLME during Delta variant dominant period.

Based on results in the figure S1 and figure S2, we can conclude that the distribution of these residuals can be considered approximately normal.

- Low collinearity between predictors

Table S3. The variance inflation factor (VIF) for covariates in the mLME during Delta variant dominant period

| <b>Covariates</b>                                    | <b>VIF</b> |
|------------------------------------------------------|------------|
| Percentage of population fully vaccinated (Tertiles) | 1.247      |
| Rule of Law (Tertiles)                               | 1.017      |
| Population (Tertiles)                                | 1.013      |
| Time                                                 | 1.240      |

The variance inflation factor (VIF) for independent variables in the mLME are presented in Table S3. VIF values are about 1 which means lack of strong collinearity

## 2.2. Omicron variant dominant period

### 2.2.1. Model selection of the multivariable linear mixed effect model (mLME) during Omicron variant dominant period

Table S4 shows the significant covariates ( $p < 0.05$ ) was identified using the univariate analysis of mLME. The variables were ranked in decreasing order of good of fitness based on their BIC values.

Table S4. Univariate model results and sequence in which covariates were added in the forward selection multivariable linear mixed effect model (mLME) during Omicron variant dominant period

| <b>Rank</b> | <b>Covariates</b>                  | <b>Coefficient</b> | <b>P values</b> | <b>BIC</b> |
|-------------|------------------------------------|--------------------|-----------------|------------|
| 1           | Intercept                          | -1.35              | 0.000           | 146.445    |
|             | Government Effectiveness (T2)      | -0.373             | 0.094           |            |
|             | Government Effectiveness (T3)      | -0.972             | 0.000           |            |
|             | Time                               | 0.069              | 0.002           |            |
| 2           | Intercept                          | -1.372             | 0.000           | 146.808    |
|             | % population fully vaccinated (T2) | -0.649             | 0.000           |            |
|             | % population fully vaccinated (T3) | -0.699             | 0.000           |            |
|             | Time                               | 0.074              | 0.003           |            |



|    |                                                   |        |       |         |
|----|---------------------------------------------------|--------|-------|---------|
| 3  | Intercept                                         | -1.497 | 0.000 | 149.207 |
|    | Rule of Law (T2)                                  | -0.067 | 0.769 |         |
|    | Rule of Law (T3)                                  | -0.822 | 0.001 |         |
|    | Time                                              | 0.069  | 0.002 |         |
| 4  | Intercept                                         | -1.989 | 0.000 | 151.369 |
|    | Number of hospital beds per 1000 inhabitants (T2) | -0.136 | 0.567 |         |
|    | Number of hospital beds per 1000 inhabitants (T3) | 0.667  | 0.007 |         |
|    | Time                                              | 0.069  | 0.002 |         |
| 5  | Intercept                                         | -1.423 | 0.000 | 152.488 |
|    | Regulatory Quality (T2)                           | -0.338 | 0.168 |         |
|    | Regulatory Quality (T3)                           | -0.792 | 0.002 |         |
|    | Time                                              | 0.069  | 0.002 |         |
| 6  | Intercept                                         | -2.267 | 0.000 | 152.820 |
|    | Burden of cancer (T2)                             | 0.662  | 0.01  |         |
|    | Burden of cancer (T3)                             | 0.757  | 0.003 |         |
|    | Time                                              | 0.069  | 0.002 |         |
| 7  | Intercept                                         | -1.466 | 0.000 | 152.864 |
|    | % population living in Urban area (T2)            | -0.213 | 0.382 |         |
|    | % population living in Urban area (T3)            | -0.779 | 0.002 |         |
|    | Time                                              | 0.069  | 0.002 |         |
| 8  | Intercept                                         | -1.42  | 0.000 | 153.764 |
|    | GDP per capita (T2)                               | -0.399 | 0.113 |         |
|    | GDP per capita (T3)                               | -0.746 | 0.004 |         |
|    | Time                                              | 0.069  | 0.002 |         |
| 9  | Intercept                                         | -2.275 | 0.000 | 154.586 |
|    | Burden of tobacco smoking (T2)                    | 0.652  | 0.013 |         |
|    | Burden of tobacco smoking (T3)                    | 0.788  | 0.003 |         |
|    | Time                                              | 0.069  | 0.002 |         |
| 10 | Intercept                                         | -1.518 | 0.000 | 156.494 |
|    | Burden of chronic kidney diseases (T2)            | -0.643 | 0.018 |         |
|    | Burden of chronic kidney diseases (T3)            | -0.242 | 0.34  |         |
|    | Time                                              | 0.069  | 0.002 |         |
| 11 | Intercept                                         | -2.157 | 0.000 | 156.612 |
|    | Burden of low bone density (T2)                   | 0.421  | 0.111 |         |
|    | Burden of low bone density (T3)                   | 0.654  | 0.014 |         |
|    | Time                                              | 0.069  | 0.002 |         |
| 12 | Intercept                                         | -1.447 | 0.000 | 156.655 |
|    | Life expectancy (T2)                              | -0.574 | 0.033 |         |
|    | Life expectancy (T3)                              | -0.509 | 0.051 |         |
|    | Time                                              | 0.069  | 0.002 |         |
| 13 | Intercept                                         | -1.98  | 0.000 | 156.711 |
|    | Burden of non-communicable diseases (T2)          | -0.015 | 0.954 |         |
|    | Burden of non-communicable diseases (T3)          | 0.534  | 0.041 |         |

|    |                                        |        |       |         |
|----|----------------------------------------|--------|-------|---------|
|    | Time                                   | 0.069  | 0.002 |         |
| 14 | Intercept                              | -1.614 | 0.000 | 156.861 |
|    | Population density (T2)                | -0.006 | 0.981 |         |
|    | Population density (T3)                | -0.537 | 0.041 |         |
|    | Time                                   | 0.069  | 0.002 |         |
| 15 | Intercept                              | -2.086 | 0.000 | 157.152 |
|    | Burden of cardiovascular diseases (T2) | 0.246  | 0.349 |         |
|    | Burden of cardiovascular diseases (T3) | 0.605  | 0.023 |         |
|    | Time                                   | 0.069  | 0.002 |         |
| 16 | Intercept                              | -2.118 | 0.000 | 157.241 |
|    | Burden of zinc deficiency (T2)         | 0.363  | 0.171 |         |
|    | Burden of zinc deficiency (T3)         | 0.592  | 0.026 |         |
|    | Time                                   | 0.069  | 0.002 |         |

Table S5 presents the results of the multivariable linear mixed effect model (mLME) which includes the significant covariates selected from the forward selection during Omicron variant dominant period.

Table S5. The final model of multivariable linear mixed effect model in Omicron variant dominant period

| Covariates                                       | Coefficient | p value | Lower bound | Upper bound |
|--------------------------------------------------|-------------|---------|-------------|-------------|
| Intercept                                        | -1.695      | 0.000   | -2.182      | -1.207      |
| Medium level -% population fully vaccinated (T2) | -0.306      | 0.041   | -0.600      | -0.012      |
| High level -% population fully vaccinated (T3)   | -0.358      | 0.040   | -0.700      | -0.017      |
| Medium level - Government effectiveness (T2)     | -0.338      | 0.037   | -0.654      | -0.022      |
| High level - Government effectiveness (T3)       | -0.780      | 0.000   | -1.118      | -0.443      |
| Medium burden -Low bone density (T2)             | 0.314       | 0.082   | -0.042      | 0.670       |
| High burden -Low bone density (T3)               | 0.531       | 0.003   | 0.191       | 0.871       |
| Medium level - Death rate caused by Cancer (T2)  | 0.430       | 0.016   | 0.088       | 0.773       |
| High level - Death rate caused by Cancer (T3)    | 0.183       | 0.311   | -0.179      | 0.544       |
| Time                                             | 0.072       | 0.002   | 0.028       | 0.116       |
| BIC                                              | 154.821     |         |             |             |
| R2 Conditional                                   | 0.927       |         |             |             |
| R2 Marginal                                      | 0.623       |         |             |             |

### 2.2.2. Testing the assumption of the mLME during Omicron variant dominant period

- Normality in the distribution of the residuals

The figure S3 presents the residuals across all countries and over the time.

The residuals in the intercepts and slopes across countries and in the between-country intercept and slope residuals were indicated in the Figure S4.

According to results of Figure S3 and Figure S4, the distribution of these residuals can be considered approximately normal.

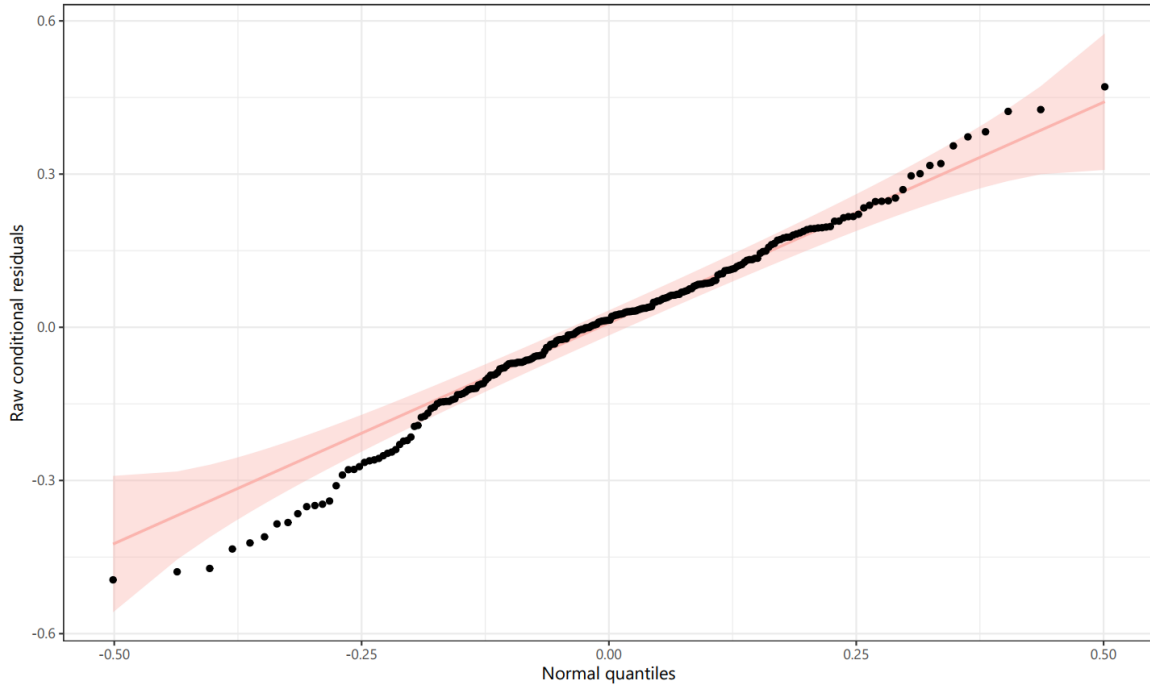

Figure S3. The residuals across all countries and over the time for the mLME during Omicron variant dominant period.

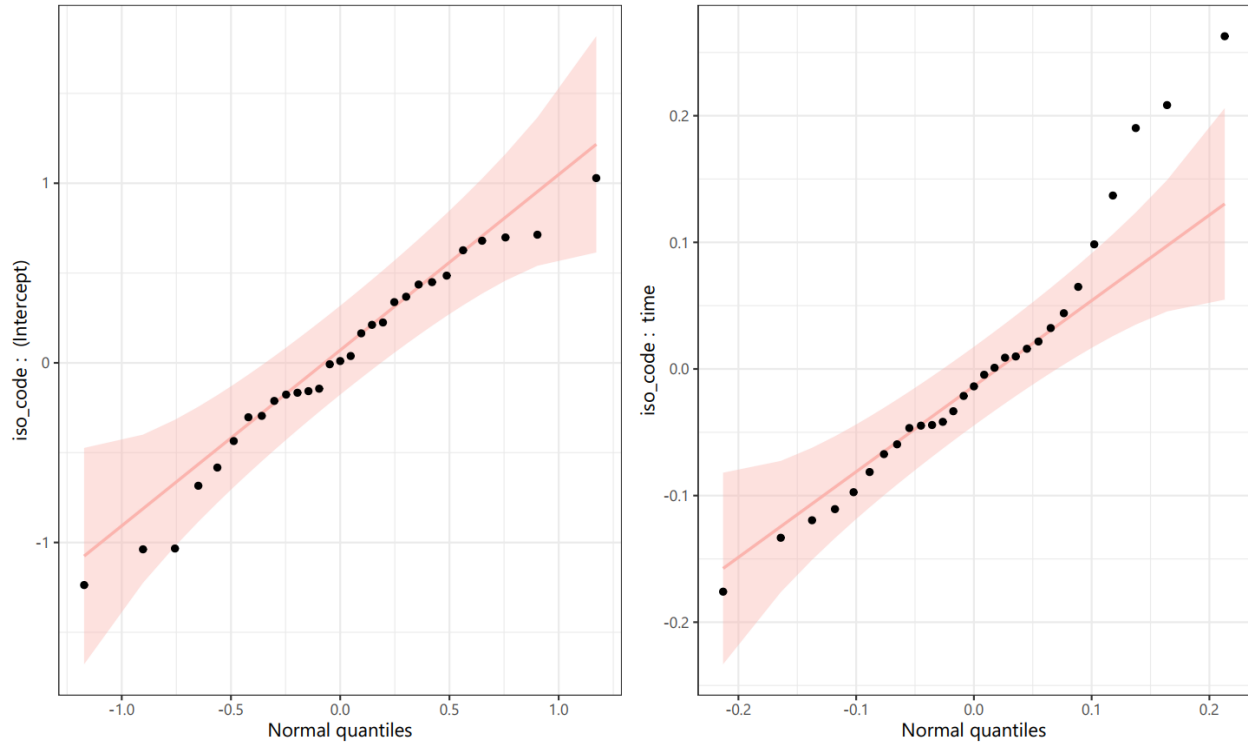

Figure S4. The residuals in the intercepts and slopes across countries and in the between-country intercept and slope residuals for mLME during Omicron variant dominant period.

- Low collinearity between predictors

Table S6. The variance inflation factor (VIF) for covariates in the mLME during Omicron variant dominant period

| Covariates                                           | VIF   |
|------------------------------------------------------|-------|
| Percentage of population fully vaccinated (Tertiles) | 1.863 |
| Government effectiveness (Tertiles)                  | 1.438 |
| Burden of Low bone density (Tertiles)                | 1.528 |
| Burden of cancer (Tertiles)                          | 1.747 |
| Time                                                 | 1.009 |

Table S6 indicates the variance inflation factor (VIF) for covariates in the mLME. VIF values were below 10, which means a lack of strong collinearity.

### 3. Variables and data sources

Table S7. List of variables and their data sources

|    | Variables                                | Range value   | Values recorded | Data source                                                                                                                                                                                                                                                                           |
|----|------------------------------------------|---------------|-----------------|---------------------------------------------------------------------------------------------------------------------------------------------------------------------------------------------------------------------------------------------------------------------------------------|
| 1  | Rule of Law                              | 1 - 5         | No applicable   | Worldwide Governance Indicators<br><a href="http://info.worldbank.org/governance/wgi">http://info.worldbank.org/governance/wgi</a>                                                                                                                                                    |
| 2  | Regulatory Quality                       | 1 -5          | No applicable   |                                                                                                                                                                                                                                                                                       |
| 3  | Government Effectiveness                 | -2.5 - 2.5    | No applicable   |                                                                                                                                                                                                                                                                                       |
| 4  | Population                               | No applicable | No applicable   | World Bank Open Data<br>Link: <a href="https://data.worldbank.org/">https://data.worldbank.org/</a>                                                                                                                                                                                   |
| 5  | Population density                       | No applicable | No applicable   |                                                                                                                                                                                                                                                                                       |
| 6  | Life expectancy                          | No applicable | No applicable   |                                                                                                                                                                                                                                                                                       |
| 7  | GDP per capita (USD per capita)          | No applicable | No applicable   |                                                                                                                                                                                                                                                                                       |
| 8  | % population aged over 65                | No applicable | No applicable   |                                                                                                                                                                                                                                                                                       |
| 9  | % population living in Urban area        | No applicable | No applicable   |                                                                                                                                                                                                                                                                                       |
| 10 | UHC index                                | 0-100         | No applicable   | Global Health Observatory indicator views<br><a href="https://apps.who.int/gho/data/node.imr">https://apps.who.int/gho/data/node.imr</a> 2019                                                                                                                                         |
| 11 | No. Physician per 1000                   | No applicable | No applicable   | World Bank Open Data<br><a href="https://data.worldbank.org">https://data.worldbank.org</a>                                                                                                                                                                                           |
| 12 | No. Nurse and Midwife per 1000           | No applicable | No applicable   |                                                                                                                                                                                                                                                                                       |
| 13 | % GDP for health expenditure             | No applicable | No applicable   |                                                                                                                                                                                                                                                                                       |
| 14 | PM2.5                                    | No applicable | No applicable   |                                                                                                                                                                                                                                                                                       |
| 15 | Tobacco                                  | No applicable | No applicable   |                                                                                                                                                                                                                                                                                       |
| 16 | Global health security index (GHS index) | No applicable | No applicable   | World Health Organization<br><a href="https://www.ghsindex.org/about/">https://www.ghsindex.org/about/</a>                                                                                                                                                                            |
| 17 | Non-communicable diseases                | No applicable | No applicable   | Global Burden of disease<br><br><a href="https://www.healthdata.org/gbd/2019">https://www.healthdata.org/gbd/2019</a><br><br>(We retrieved the death rate per 100000 inhabitants and years live with disability (YLD) per 100000 inhabitants )                                        |
| 18 | Diabetes                                 | No applicable | No applicable   |                                                                                                                                                                                                                                                                                       |
| 19 | Chronic respiratory disease              | No applicable | No applicable   |                                                                                                                                                                                                                                                                                       |
| 20 | Cancer                                   | No applicable | No applicable   |                                                                                                                                                                                                                                                                                       |
| 21 | Chronic kidney diseases                  | No applicable | No applicable   |                                                                                                                                                                                                                                                                                       |
| 22 | Cardiovascular diseases                  | No applicable | No applicable   |                                                                                                                                                                                                                                                                                       |
| 23 | Zinc deficiency                          | No applicable | No applicable   |                                                                                                                                                                                                                                                                                       |
| 24 | Vitamin A deficiency                     | No applicable | No applicable   |                                                                                                                                                                                                                                                                                       |
| 25 | Low bone density                         | No applicable | No applicable   |                                                                                                                                                                                                                                                                                       |
| 26 | Stringency index                         | 0 - 100       | No applicable   | Oxford database: The Oxford COVID-19 Government Response Tracker (OxCGRT)<br>Link:<br><a href="https://www.bsg.ox.ac.uk/research/research-projects/covid-19-government-response-tracker">https://www.bsg.ox.ac.uk/research/research-projects/covid-19-government-response-tracker</a> |

|    |                                           |               |               |                                                                                                                                                                                      |
|----|-------------------------------------------|---------------|---------------|--------------------------------------------------------------------------------------------------------------------------------------------------------------------------------------|
| 27 | % population vaccinated at least one dose | No applicable | No applicable | Oxford database: A global database of COVID-19 vaccinations<br><br><a href="https://ourworldindata.org/covid-vaccinations">https://ourworldindata.org/covid-vaccinations</a><br>2021 |
| 28 | % population fully vaccinated             | No applicable | No applicable |                                                                                                                                                                                      |
| 29 | % population vaccinated the booster dose  | No applicable | No applicable |                                                                                                                                                                                      |

#### 4. Study period

Table S8. The study period of countries during Delta variant and Omicron variant period

| ISO Code | Country        | The first date of study period (Delta) | The last date of study period (Delta) | The first date of study period (Omicron) | The last date of study period (Omicron) |
|----------|----------------|----------------------------------------|---------------------------------------|------------------------------------------|-----------------------------------------|
| AUS      | Australia      | 06/20/2021                             | 08/14/2021                            | 12/26/2021                               | 02/19/2022                              |
| BEL      | Belgium        | 06/27/2021                             | 08/21/2021                            | 01/02/2022                               | 02/26/2022                              |
| BGR      | Bulgaria       | 07/04/2021                             | 08/28/2021                            | 01/16/2022                               | 03/12/2022                              |
| CAN      | Canada         | 07/11/2021                             | 09/04/2021                            | 12/19/2021                               | 02/12/2022                              |
| CZE      | Czechia        | 06/27/2021                             | 08/21/2021                            | 01/02/2022                               | 02/26/2022                              |
| CHE      | Switzerland    | 07/04/2021                             | 08/28/2021                            | 12/26/2021                               | 02/19/2022                              |
| DNK      | Denmark        | 07/04/2021                             | 08/28/2021                            | 12/26/2021                               | 02/19/2022                              |
| ESP      | Spain          | 07/04/2021                             | 08/28/2021                            | 12/26/2021                               | 02/19/2022                              |
| EST      | Estonia        | 07/04/2021                             | 08/28/2021                            | 01/09/2022                               | 03/05/2022                              |
| FIN      | Finland        | 06/20/2021                             | 08/14/2021                            | 01/02/2022                               | 02/26/2022                              |
| FRA      | France         | 07/04/2021                             | 08/28/2021                            | 01/02/2022                               | 02/26/2022                              |
| GBR      | United Kingdom | 05/23/2021                             | 07/17/2021                            | 12/19/2021                               | 02/12/2022                              |
| IRL      | Ireland        | 06/27/2021                             | 08/21/2021                            | 12/19/2021                               | 02/12/2022                              |
| ISR      | Israel         | 06/06/2021                             | 07/31/2021                            | 12/26/2021                               | 02/19/2022                              |
| ITA      | Italy          | 07/04/2021                             | 08/28/2021                            | 01/02/2022                               | 02/26/2022                              |
| JPN      | Japan          | 07/25/2021                             | 09/18/2021                            | 01/02/2022                               | 02/26/2022                              |
| LUX      | Luxembourg     | 06/20/2021                             | 08/14/2021                            | 01/02/2022                               | 02/26/2022                              |
| LVA      | Latvia         | 06/27/2021                             | 08/21/2021                            | 01/16/2022                               | 03/12/2022                              |
| MLT      | Malta          | 07/04/2021                             | 08/28/2021                            | 01/02/2022                               | 02/26/2022                              |
| MYS      | Malaysia       | 06/13/2021                             | 08/07/2021                            | 12/26/2021                               | 02/19/2022                              |
| NLD      | Netherlands    | 07/04/2021                             | 08/28/2021                            | 01/02/2022                               | 02/26/2022                              |
| PRT      | Portugal       | 06/13/2021                             | 08/07/2021                            | 12/26/2021                               | 02/19/2022                              |

|     |               |            |            |            |            |
|-----|---------------|------------|------------|------------|------------|
| ROU | Romania       | 07/11/2021 | 09/04/2021 | 01/02/2022 | 02/26/2022 |
| SGP | Singapore     | 04/25/2021 | 06/19/2021 | 12/26/2021 | 02/19/2022 |
| SRB | Serbia        | 07/25/2021 | 09/18/2021 | 01/02/2022 | 02/26/2022 |
| SVK | Slovakia      | 07/11/2021 | 09/04/2021 | 01/16/2022 | 03/12/2022 |
| SVN | Slovenia      | 07/11/2021 | 09/04/2021 | 01/02/2022 | 02/26/2022 |
| SWE | Sweden        | 07/04/2021 | 08/28/2021 | 12/26/2021 | 02/19/2022 |
| USA | United States | 06/27/2021 | 08/21/2021 | 12/26/2021 | 02/19/2022 |

## 5. Vaccination, stringency index and resilience index

Table S9. The variation of stringency index in 29 countries during the first eight weeks of the Delta period

| Country     | Week 0 | Week 1 | Week 2 | Week 3 | Week 4 | Week 5 | Week 6 | Week 7 |
|-------------|--------|--------|--------|--------|--------|--------|--------|--------|
| Australia   | 55.4   | 69.1   | 68.1   | 68.1   | 68.1   | 68.1   | 68.1   | 69.6   |
| Belgium     | 50.9   | 50.9   | 50.9   | 50.9   | 49.9   | 48.3   | 47.2   | 47.2   |
| Bulgaria    | 42.6   | 42.6   | 42.6   | 42.6   | 20.4   | 20.4   | 20.4   | 20.4   |
| Canada      | 67.3   | 60.7   | 60.7   | 59.1   | 60.7   | 60.7   | 65.1   | 70.7   |
| Czechia     | 39.0   | 36.0   | 35.2   | 35.7   | 37.0   | 37.0   | 37.0   | 27.6   |
| Denmark     | 47.2   | 47.2   | 47.2   | 46.0   | 38.9   | 38.9   | 38.9   | 38.9   |
| Estonia     | 27.4   | 23.2   | 23.2   | 23.2   | 23.2   | 23.2   | 23.2   | 25.5   |
| Finland     | 47.7   | 46.1   | 44.0   | 44.0   | 44.0   | 43.2   | 38.4   | 38.4   |
| France      | 46.2   | 44.0   | 44.0   | 44.0   | 44.0   | 56.7   | 66.7   | 66.7   |
| Ireland     | 50.0   | 44.4   | 44.4   | 44.4   | 44.4   | 44.4   | 44.4   | 44.4   |
| Israel      | 29.6   | 24.3   | 25.7   | 29.6   | 29.6   | 29.6   | 33.6   | 35.2   |
| Italy       | 47.2   | 63.4   | 75.5   | 70.6   | 59.9   | 62.3   | 63.9   | 63.9   |
| Japan       | 50.5   | 50.5   | 50.5   | 50.7   | 52.3   | 52.3   | 52.3   | 51.0   |
| Latvia      | 41.7   | 41.7   | 41.7   | 41.7   | 41.7   | 41.7   | 41.7   | 41.7   |
| Luxembourg  | 41.7   | 41.7   | 41.7   | 41.7   | 39.0   | 38.0   | 38.0   | 38.0   |
| Malaysia    | 74.7   | 78.7   | 79.5   | 80.6   | 80.6   | 83.9   | 85.2   | 83.3   |
| Malta       | 44.3   | 45.6   | 47.2   | 47.2   | 46.2   | 43.5   | 43.5   | 43.5   |
| Netherlands | 32.9   | 36.1   | 40.1   | 41.7   | 41.7   | 41.7   | 41.7   | 41.7   |
| Portugal    | 64.4   | 65.6   | 67.7   | 66.4   | 63.9   | 63.9   | 63.9   | 58.3   |
| Romania     | 36.4   | 38.4   | 38.4   | 38.4   | 40.8   | 55.1   | 55.1   | 55.1   |

|                |      |      |      |      |      |      |      |      |
|----------------|------|------|------|------|------|------|------|------|
| Serbia         | 36.1 | 36.1 | 36.1 | 36.1 | 36.1 | 36.1 | 36.1 | 36.1 |
| Singapore      | 50.9 | 52.3 | 52.8 | 56.0 | 58.3 | 58.3 | 58.3 | 58.3 |
| Slovakia       | 44.0 | 44.0 | 44.0 | 44.0 | 44.0 | 36.0 | 34.7 | 34.7 |
| Slovenia       | 28.6 | 25.9 | 25.9 | 27.0 | 29.6 | 33.6 | 35.2 | 37.8 |
| Spain          | 48.6 | 48.9 | 48.5 | 47.7 | 47.7 | 47.7 | 47.7 | 47.7 |
| Sweden         | 51.9 | 45.5 | 37.0 | 37.0 | 37.0 | 37.0 | 37.0 | 37.0 |
| Switzerland    | 44.4 | 44.4 | 42.3 | 40.7 | 40.7 | 40.7 | 40.7 | 40.7 |
| United Kingdom | 62.5 | 62.5 | 51.4 | 51.4 | 51.4 | 51.4 | 51.4 | 51.4 |
| United States  | 61.6 | 56.4 | 49.5 | 49.5 | 49.5 | 49.5 | 54.2 | 56.0 |

Table S10. The variation of stringency index in 29 countries during the first eight weeks of the Omicron period

| Country     | Week 0 | Week 1 | Week 2 | Week 3 | Week 4 | Week 5 | Week 6 | Week 7 |
|-------------|--------|--------|--------|--------|--------|--------|--------|--------|
| Australia   | 40.3   | 41.9   | 44.2   | 61.3   | 64.2   | 55.6   | 55.6   | 53.2   |
| Belgium     | 44.4   | 44.4   | 44.4   | 44.4   | 50.0   | 50.0   | 50.0   | 47.4   |
| Bulgaria    | 50.0   | 50.0   | 46.0   | 44.4   | 44.4   | 44.4   | 44.4   | 44.4   |
| Canada      | 67.4   | 71.9   | 77.7   | 78.2   | 76.7   | 78.2   | 77.7   | 77.2   |
| Czechia     | 38.0   | 38.0   | 47.2   | 47.2   | 42.5   | 41.7   | 41.7   | 41.7   |
| Denmark     | 38.4   | 35.2   | 37.8   | 38.9   | 38.9   | 23.0   | 16.7   | 16.7   |
| Estonia     | 42.6   | 43.5   | 43.5   | 49.1   | 49.5   | 46.3   | 46.3   | 46.3   |
| Finland     | 34.7   | 34.7   | 34.7   | 40.7   | 42.1   | 41.7   | 41.7   | 41.7   |
| France      | 72.2   | 69.4   | 69.4   | 69.4   | 69.4   | 69.4   | 69.4   | 69.4   |
| Ireland     | 50.4   | 52.8   | 52.8   | 52.8   | 48.5   | 23.2   | 23.2   | 23.2   |
| Israel      | 56.5   | 56.5   | 56.5   | 56.5   | 56.5   | 56.5   | 49.3   | 48.2   |
| Italy       | 76.9   | 76.9   | 76.9   | 76.9   | 76.9   | 76.9   | 76.9   | 76.9   |
| Japan       | 47.2   | 47.2   | 47.2   | 47.2   | 47.2   | 47.2   | 47.2   | 47.2   |
| Latvia      | 35.2   | 37.0   | 48.2   | 48.2   | 48.2   | 48.2   | 44.4   | 37.0   |
| Luxembourg  | 46.3   | 46.3   | 46.3   | 52.9   | 55.6   | 50.3   | 46.3   | 46.3   |
| Malaysia    | 50.5   | 50.5   | 62.8   | 64.8   | 64.8   | 54.2   | 54.2   | 54.2   |
| Malta       | 43.5   | 43.5   | 43.5   | 46.2   | 52.8   | 52.8   | 52.8   | 52.8   |
| Netherlands | 69.4   | 65.2   | 58.3   | 58.3   | 58.3   | 58.3   | 50.4   | 47.2   |



|                |      |      |      |      |      |      |      |      |
|----------------|------|------|------|------|------|------|------|------|
| Portugal       | 45.0 | 42.6 | 35.7 | 31.5 | 31.5 | 31.5 | 31.5 | 29.9 |
| Romania        | 52.8 | 52.8 | 52.8 | 52.8 | 48.8 | 47.2 | 47.2 | 47.2 |
| Serbia         | 28.7 | 28.7 | 28.7 | 34.0 | 36.1 | 36.1 | 36.1 | 36.1 |
| Singapore      | 44.4 | 44.4 | 44.4 | 55.7 | 60.2 | 60.2 | 60.2 | 60.2 |
| Slovakia       | 54.4 | 50.5 | 49.5 | 46.3 | 46.3 | 46.3 | 46.3 | 46.3 |
| Slovenia       | 51.3 | 50.0 | 61.1 | 63.0 | 63.0 | 63.0 | 62.4 | 59.3 |
| Spain          | 54.2 | 43.5 | 43.5 | 43.5 | 46.7 | 49.1 | 49.1 | 49.1 |
| Sweden         | 49.1 | 49.1 | 51.2 | 52.4 | 50.0 | 50.0 | 32.5 | 19.4 |
| Switzerland    | 50.9 | 56.5 | 56.5 | 56.5 | 56.5 | 56.5 | 56.5 | 42.2 |
| United Kingdom | 48.6 | 48.6 | 48.6 | 48.6 | 48.1 | 44.8 | 42.1 | 41.3 |
| United States  | 50.1 | 50.5 | 50.5 | 53.6 | 56.0 | 58.0 | 58.8 | 58.8 |

Table S11. The percentage of population fully vaccinated in 29 countries during the first eight weeks of the Delta period

| Country    | Week 0 | Week 1 | Week 2 | Week 3 | Week 4 | Week 5 | Week 6 | Week 7 |
|------------|--------|--------|--------|--------|--------|--------|--------|--------|
| Australia  | 5.6    | 7.2    | 8.9    | 10.9   | 11.0   | 15.2   | 17.9   | 20.8   |
| Belgium    | 36.5   | 42.3   | 48.1   | 54.0   | 59.6   | 61.1   | 66.4   | 68.2   |
| Bulgaria   | 12.3   | 12.4   | 12.4   | 14.5   | 15.0   | 15.5   | 16.0   | 16.7   |
| Canada     | 49.1   | 54.6   | 58.8   | 61.4   | 63.4   | 65.2   | 66.6   | 67.6   |
| Czechia    | 32.8   | 35.8   | 39.6   | 43.0   | 45.5   | 47.6   | 49.8   | 51.7   |
| Denmark    | 38.5   | 43.6   | 49.0   | 53.4   | 57.8   | 63.6   | 67.6   | 70.0   |
| Estonia    | 37.0   | 39.1   | 41.2   | 42.6   | 44.0   | 45.4   | 46.5   | 47.6   |
| Finland    | 15.5   | 17.8   | 21.0   | 24.7   | 28.0   | 31.7   | 35.5   | 39.1   |
| France     | 33.5   | 41.4   | 45.2   | 48.0   | 50.2   | 52.3   | 55.6   | 58.8   |
| Ireland    | 40.0   | 45.8   | 49.8   | 53.8   | 57.0   | 59.8   | 63.0   | 65.9   |
| Israel     | 55.6   | 55.7   | 55.8   | 56.0   | 56.0   | 56.5   | 57.3   | 58.2   |
| Italy      | 38.0   | 43.4   | 48.3   | 52.5   | 55.5   | 56.5   | 58.5   | 60.2   |
| Japan      | 30.0   | 33.0   | 36.8   | 40.1   | 43.9   | 47.3   | 50.0   | 53.3   |
| Latvia     | 30.9   | 33.1   | 34.3   | 35.5   | 36.6   | 37.6   | 38.5   | 39.5   |
| Luxembourg | 6.0    | 6.0    | 6.0    | 6.0    | 6.0    | 6.0    | 6.0    | 6.0    |
| Malaysia   | 4.9    | 6.3    | 7.9    | 10.7   | 13.8   | 16.9   | 21.1   | 26.5   |
| Malta      | 67.8   | 69.2   | 71.6   | 74.1   | 76.6   | 78.4   | 79.3   | 79.8   |

|                |      |      |      |      |      |      |      |      |
|----------------|------|------|------|------|------|------|------|------|
| Netherlands    | 41.2 | 46.3 | 50.2 | 54.1 | 58.4 | 62.2 | 63.5 | 64.7 |
| Portugal       | 28.7 | 32.5 | 34.6 | 40.3 | 48.3 | 53.4 | 59.0 | 64.3 |
| Romania        | 24.7 | 25.1 | 25.4 | 25.8 | 25.8 | 26.4 | 26.7 | 27.0 |
| Serbia         | 39.3 | 39.6 | 40.1 | 40.3 | 40.7 | 41.0 | 41.2 | 41.6 |
| Singapore      | 20.8 | 22.6 | 25.2 | 28.3 | 31.0 | 33.4 | 35.5 | 37.3 |
| Slovakia       | 35.3 | 36.5 | 37.7 | 39.0 | 40.0 | 40.8 | 41.5 | 42.0 |
| Slovenia       | 38.0 | 39.2 | 40.3 | 41.4 | 42.5 | 43.6 | 44.5 | 45.4 |
| Spain          | 44.9 | 50.0 | 54.3 | 57.6 | 60.5 | 63.2 | 66.5 | 69.4 |
| Sweden         | 33.9 | 35.9 | 37.5 | 39.5 | 42.1 | 45.0 | 48.3 | 52.4 |
| Switzerland    | 42.8 | 46.2 | 48.8 | 50.3 | 51.3 | 52.2 | 53.1 | 53.9 |
| United Kingdom | 37.1 | 38.2 | 43.7 | 46.0 | 47.6 | 49.3 | 51.0 | 51.1 |
| United States  | 49.2 | 49.7 | 50.2 | 50.7 | 51.2 | 51.7 | 52.2 | 53.0 |

Table S12. The percentage of population fully vaccinated in 29 countries during the first eight weeks of the Omicron period

| Country    | Week 0 | Week 1 | Week 2 | Week 3 | Week 4 | Week 5 | Week 6 | Week 7 |
|------------|--------|--------|--------|--------|--------|--------|--------|--------|
| Australia  | 76.6   | 77.1   | 77.6   | 78.0   | 78.0   | 78.7   | 79.0   | 79.1   |
| Belgium    | 76.0   | 76.1   | 76.2   | 76.2   | 76.7   | 77.3   | 77.6   | 78.1   |
| Bulgaria   | 28.7   | 28.9   | 29.2   | 29.4   | 29.4   | 29.6   | 29.7   | 29.8   |
| Canada     | 77.1   | 77.3   | 77.5   | 77.9   | 78.3   | 78.9   | 79.7   | 79.9   |
| Czechia    | 62.5   | 62.7   | 63.0   | 63.2   | 63.5   | 63.6   | 63.7   | 63.7   |
| Denmark    | 78.1   | 79.5   | 80.3   | 80.8   | 81.1   | 81.2   | 81.3   | 81.4   |
| Estonia    | 62.4   | 62.6   | 62.8   | 63.0   | 63.1   | 63.2   | 63.3   | 63.4   |
| Finland    | 73.6   | 73.6   | 73.6   | 74.4   | 75.3   | 75.8   | 76.0   | 76.1   |
| France     | 74.4   | 75.2   | 75.8   | 76.1   | 76.8   | 76.9   | 77.4   | 77.5   |
| Ireland    | 77.3   | 77.6   | 77.7   | 77.8   | 77.9   | 78.1   | 78.7   | 79.1   |
| Israel     | 63.9   | 64.3   | 64.8   | 65.3   | 65.3   | 65.7   | 65.8   | 65.9   |
| Italy      | 74.6   | 75.1   | 75.6   | 75.7   | 76.9   | 77.7   | 78.0   | 78.6   |
| Japan      | 78.3   | 78.9   | 79.0   | 79.1   | 79.2   | 79.3   | 79.3   | 79.5   |
| Latvia     | 68.7   | 68.8   | 69.2   | 69.3   | 69.5   | 69.6   | 69.6   | 69.6   |
| Luxembourg | 6.0    | 6.0    | 6.0    | 6.0    | 6.0    | 6.0    | 6.0    | 71.9   |
| Malaysia   | 78.2   | 78.3   | 78.4   | 78.4   | 78.5   | 78.5   | 78.5   | 78.5   |

|                |      |      |      |      |      |      |      |      |
|----------------|------|------|------|------|------|------|------|------|
| Malta          | 84.7 | 85.3 | 86.0 | 86.8 | 87.6 | 88.9 | 89.1 | 89.7 |
| Netherlands    | 71.5 | 71.6 | 71.7 | 71.8 | 71.8 | 71.8 | 71.9 | 71.9 |
| Portugal       | 89.5 | 89.8 | 90.1 | 90.3 | 90.5 | 90.6 | 91.3 | 91.4 |
| Romania        | 41.2 | 41.4 | 41.5 | 41.7 | 41.8 | 41.9 | 42.0 | 42.1 |
| Serbia         | 46.9 | 47.0 | 47.1 | 47.2 | 47.3 | 47.4 | 47.4 | 47.5 |
| Singapore      | 85.1 | 85.4 | 85.6 | 86.0 | 86.7 | 87.4 | 88.4 | 89.2 |
| Slovakia       | 49.6 | 49.9 | 50.2 | 50.4 | 50.5 | 50.6 | 50.6 | 50.6 |
| Slovenia       | 57.5 | 57.9 | 58.0 | 58.2 | 58.4 | 58.5 | 58.6 | 58.6 |
| Spain          | 81.0 | 81.4 | 81.6 | 81.8 | 81.9 | 81.9 | 82.1 | 82.1 |
| Sweden         | 72.2 | 72.4 | 72.6 | 73.2 | 73.6 | 73.9 | 74.1 | 74.3 |
| Switzerland    | 66.9 | 67.3 | 67.5 | 67.7 | 67.9 | 68.2 | 68.2 | 68.5 |
| United Kingdom | 69.3 | 69.6 | 69.9 | 70.3 | 70.5 | 70.9 | 71.1 | 71.5 |
| United States  | 62.8 | 63.2 | 63.5 | 63.8 | 64.1 | 64.4 | 64.7 | 64.9 |

Table S13. The variation of standardized resilience index in 29 countries during the first eight weeks of the Delta period

| Country    | Week 0 | Week 1 | Week 2 | Week 3 | Week 4 | Week 5 | Week 6 | Week 7 |
|------------|--------|--------|--------|--------|--------|--------|--------|--------|
| Australia  | 0.004  | 0.005  | 0.006  | 0.008  | 0.008  | 0.015  | 0.019  | 0.021  |
| Belgium    | 0.063  | 0.047  | 0.041  | 0.042  | 0.049  | 0.05   | 0.064  | 0.085  |
| Bulgaria   | 0.154  | 0.111  | 0.099  | 0.095  | 0.117  | 0.166  | 0.223  | 0.387  |
| Canada     | 0.04   | 0.035  | 0.032  | 0.029  | 0.033  | 0.044  | 0.057  | 0.07   |
| Czechia    | 0.013  | 0.014  | 0.009  | 0.015  | 0.015  | 0.007  | 0.015  | 0.015  |
| Denmark    | 0.012  | 0.014  | 0.013  | 0.017  | 0.015  | 0.023  | 0.023  | 0.031  |
| Estonia    | 0.019  | 0.016  | 0.019  | 0.024  | 0.04   | 0.048  | 0.07   | 0.085  |
| Finland    | 0.012  | 0.011  | 0.013  | 0.015  | 0.014  | 0.018  | 0.026  | 0.028  |
| France     | 0.124  | 0.1    | 0.097  | 0.111  | 0.139  | 0.168  | 0.206  | 0.227  |
| Ireland    | 0.025  | 0.023  | 0.029  | 0.032  | 0.039  | 0.045  | 0.057  | 0.071  |
| Israel     | 0.019  | 0.013  | 0.013  | 0.012  | 0.012  | 0.02   | 0.025  | 0.037  |
| Italy      | 0.03   | 0.026  | 0.026  | 0.033  | 0.043  | 0.048  | 0.072  | 0.08   |
| Japan      | 0.067  | 0.087  | 0.113  | 0.139  | 0.159  | 0.173  | 0.174  | 0.156  |
| Latvia     | 0.145  | 0.108  | 0.063  | 0.045  | 0.041  | 0.028  | 0.034  | 0.056  |
| Luxembourg | 0.016  | 0.011  | 0.018  | 0.037  | 0.048  | 0.046  | 0.062  | 0.072  |

|                |       |       |       |       |       |       |       |       |
|----------------|-------|-------|-------|-------|-------|-------|-------|-------|
| Malaysia       | 0.26  | 0.26  | 0.273 | 0.306 | 0.342 | 0.392 | 0.428 | 0.469 |
| Malta          | 0.012 | 0.018 | 0.03  | 0.051 | 0.068 | 0.097 | 0.086 | 0.069 |
| Netherlands    | 0.028 | 0.025 | 0.036 | 0.054 | 0.064 | 0.067 | 0.067 | 0.072 |
| Portugal       | 0.053 | 0.064 | 0.074 | 0.087 | 0.108 | 0.128 | 0.136 | 0.141 |
| Romania        | 0.027 | 0.022 | 0.02  | 0.029 | 0.031 | 0.056 | 0.085 | 0.129 |
| Serbia         | 0.034 | 0.047 | 0.069 | 0.088 | 0.112 | 0.168 | 0.258 | 0.386 |
| Singapore      | 0.011 | 0.013 | 0.015 | 0.022 | 0.021 | 0.02  | 0.016 | 0.014 |
| Slovakia       | 0.03  | 0.033 | 0.032 | 0.028 | 0.031 | 0.034 | 0.022 | 0.032 |
| Slovenia       | 0.03  | 0.027 | 0.026 | 0.026 | 0.025 | 0.038 | 0.069 | 0.102 |
| Spain          | 0.078 | 0.106 | 0.158 | 0.216 | 0.259 | 0.253 | 0.253 | 0.25  |
| Sweden         | 0.024 | 0.017 | 0.018 | 0.015 | 0.017 | 0.019 | 0.025 | 0.032 |
| Switzerland    | 0.019 | 0.019 | 0.023 | 0.031 | 0.036 | 0.056 | 0.104 | 0.152 |
| United Kingdom | 0.018 | 0.017 | 0.02  | 0.025 | 0.031 | 0.035 | 0.049 | 0.051 |
| United States  | 0.076 | 0.082 | 0.103 | 0.136 | 0.191 | 0.266 | 0.344 | 0.427 |

Table S14. The variation of standardized resilience index in 29 countries during the first eight weeks of the Omicron period

| Country   | Week 0 | Week 1 | Week 2 | Week 3 | Week 4 | Week 5 | Week 6 | Week 7 |
|-----------|--------|--------|--------|--------|--------|--------|--------|--------|
| Australia | 0.057  | 0.085  | 0.156  | 0.197  | 0.198  | 0.181  | 0.143  | 0.13   |
| Belgium   | 0.255  | 0.248  | 0.256  | 0.258  | 0.347  | 0.382  | 0.33   | 0.238  |
| Bulgaria  | 0.876  | 0.817  | 0.913  | 0.98   | 0.992  | 0.79   | 0.765  | 0.51   |
| Canada    | 0.078  | 0.103  | 0.175  | 0.281  | 0.318  | 0.318  | 0.275  | 0.266  |
| Czechia   | 0.408  | 0.378  | 0.226  | 0.214  | 0.296  | 0.38   | 0.401  | 0.401  |
| Denmark   | 0.141  | 0.16   | 0.161  | 0.152  | 0.158  | 0.177  | 0.212  | 0.264  |
| Estonia   | 0.193  | 0.210  | 0.200  | 0.235  | 0.323  | 0.358  | 0.372  | 0.44   |
| Finland   | 0.12   | 0.119  | 0.119  | 0.113  | 0.147  | 0.142  | 0.137  | 0.134  |
| France    | 0.398  | 0.426  | 0.448  | 0.478  | 0.483  | 0.502  | 0.439  | 0.405  |
| Ireland   | 0.148  | 0.127  | 0.162  | 0.202  | 0.174  | 0.149  | 0.164  | 0.144  |
| Israel    | 0.041  | 0.059  | 0.12   | 0.203  | 0.208  | 0.458  | 0.387  | 0.371  |
| Italy     | 0.26   | 0.333  | 0.376  | 0.376  | 0.374  | 0.333  | 0.296  | 0.227  |
| Japan     | 0.012  | 0.027  | 0.048  | 0.08   | 0.09   | 0.152  | 0.157  | 0.194  |
| Latvia    | 0.426  | 0.441  | 0.5    | 0.521  | 0.547  | 0.641  | 0.694  | 0.675  |

|                |       |       |       |       |       |       |       |       |
|----------------|-------|-------|-------|-------|-------|-------|-------|-------|
| Luxembourg     | 0.203 | 0.22  | 0.185 | 0.133 | 0.166 | 0.165 | 0.167 | 0.131 |
| Malaysia       | 0.086 | 0.076 | 0.069 | 0.055 | 0.048 | 0.05  | 0.072 | 0.105 |
| Malta          | 0.202 | 0.256 | 0.264 | 0.276 | 0.21  | 0.224 | 0.228 | 0.111 |
| Netherlands    | 0.148 | 0.12  | 0.099 | 0.088 | 0.084 | 0.085 | 0.089 | 0.089 |
| Portugal       | 0.131 | 0.143 | 0.181 | 0.224 | 0.241 | 0.267 | 0.265 | 0.253 |
| Romania        | 0.174 | 0.193 | 0.252 | 0.332 | 0.483 | 0.606 | 0.612 | 0.547 |
| Serbia         | 0.241 | 0.253 | 0.3   | 0.384 | 0.505 | 0.557 | 0.502 | 0.463 |
| Singapore      | 0.039 | 0.029 | 0.025 | 0.031 | 0.051 | 0.076 | 0.108 | 0.137 |
| Slovakia       | 0.51  | 0.376 | 0.365 | 0.415 | 0.459 | 0.491 | 0.501 | 0.46  |
| Slovenia       | 0.477 | 0.454 | 0.464 | 0.509 | 0.563 | 0.581 | 0.54  | 0.471 |
| Spain          | 0.241 | 0.292 | 0.357 | 0.381 | 0.393 | 0.385 | 0.376 | 0.366 |
| Sweden         | 0.078 | 0.098 | 0.132 | 0.154 | 0.172 | 0.23  | 0.227 | 0.223 |
| Switzerland    | 0.272 | 0.251 | 0.245 | 0.238 | 0.222 | 0.212 | 0.213 | 0.186 |
| United Kingdom | 0.129 | 0.162 | 0.211 | 0.246 | 0.238 | 0.216 | 0.251 | 0.163 |
| United States  | 0.393 | 0.501 | 0.593 | 0.619 | 0.617 | 0.555 | 0.471 | 0.383 |

## 6. Unstandardized average number of Hospitalization, ICU and mortality rate throughout the Delta and Omicron period

Table S15. The unstandardized average number of daily hospital occupancy, daily ICU occupancy and mortality rate per 100000 inhabitants

| Country     | Average daily hospital occupancy<br>per 100000 inhabitants<br>(aHOSP) |         |                                        | Average daily ICU occupancy<br>per 100000 inhabitants<br>(aICU) |         |                                       | Average daily mortality rate per<br>100000 inhabitants<br>(aMOR) |         |                                       |
|-------------|-----------------------------------------------------------------------|---------|----------------------------------------|-----------------------------------------------------------------|---------|---------------------------------------|------------------------------------------------------------------|---------|---------------------------------------|
|             | Delta                                                                 | Omicron | aHOSP<br>Change <sup>a</sup><br>(Rank) | Delta                                                           | Omicron | aICU<br>Change <sup>b</sup><br>(Rank) | Delta                                                            | Omicron | aMOR<br>Change <sup>c</sup><br>(Rank) |
|             |                                                                       |         |                                        |                                                                 |         |                                       |                                                                  |         |                                       |
| Australia   | 0.733                                                                 | 14.153  | 13.419 (10)                            | 0.122                                                           | 1.165   | 1.044 (13)                            | 0.004                                                            | 0.188   | 0.185 (7)                             |
| Belgium     | 2.989                                                                 | 25.932  | 22.943 (19)                            | 0.955                                                           | 3.349   | 2.394 (21)                            | 0.025                                                            | 0.275   | 0.25 (12)                             |
| Bulgaria    | 18.235                                                                | 72.530  | 54.295 (29)                            | 1.770                                                           | 7.626   | 5.856 (28)                            | 0.161                                                            | 1.047   | 0.886 (29)                            |
| Canada      | 1.815                                                                 | 18.267  | 16.451 (14)                            | 0.746                                                           | 2.368   | 1.623 (17)                            | 0.021                                                            | 0.266   | 0.245 (11)                            |
| Czechia     | 0.481                                                                 | 26.793  | 26.312 (21)                            | 0.122                                                           | 3.435   | 3.312 (25)                            | 0.019                                                            | 0.396   | 0.377 (20)                            |
| Switzerland | 3.489                                                                 | 20.999  | 17.509 (15)                            | 0.909                                                           | 2.762   | 1.853 (18)                            | 0.022                                                            | 0.211   | 0.189 (8)                             |
| Denmark     | 1.270                                                                 | 16.692  | 15.422 (13)                            | 0.211                                                           | 0.863   | 0.652 (9)                             | 0.012                                                            | 0.335   | 0.323 (18)                            |
| Spain       | 13.085                                                                | 27.737  | 14.652 (12)                            | 3.131                                                           | 4.088   | 0.956 (11)                            | 0.118                                                            | 0.343   | 0.225 (10)                            |
| Estonia     | 4.052                                                                 | 34.692  | 30.64 (25)                             | 0.433                                                           | 1.481   | 1.048 (14)                            | 0.024                                                            | 0.465   | 0.441 (22)                            |

|                |        |        |             |       |       |            |       |       |            |
|----------------|--------|--------|-------------|-------|-------|------------|-------|-------|------------|
| Finland        | 1.020  | 11.740 | 10.72 (6)   | 0.186 | 0.836 | 0.65 (8)   | 0.015 | 0.205 | 0.19 (9)   |
| France         | 12.473 | 41.559 | 29.086 (24) | 2.064 | 5.225 | 3.161 (23) | 0.080 | 0.376 | 0.297 (17) |
| United Kingdom | 2.560  | 22.194 | 19.634 (16) | 0.382 | 1.010 | 0.627 (7)  | 0.025 | 0.300 | 0.275 (15) |
| Ireland        | 2.678  | 14.588 | 11.91 (7)   | 0.537 | 1.665 | 1.128 (15) | 0.030 | 0.163 | 0.133 (5)  |
| Israel         | 1.675  | 24.598 | 22.923 (18) | 0.205 | 2.101 | 1.895 (20) | 0.012 | 0.308 | 0.296 (16) |
| Italy          | 4.176  | 30.135 | 25.96 (20)  | 0.460 | 2.325 | 1.865 (19) | 0.042 | 0.500 | 0.458 (23) |
| Japan          | 14.906 | 13.175 | -1.731 (2)  | 1.817 | 0.889 | -0.928 (2) | 0.029 | 0.070 | 0.041 (4)  |
| Luxembourg     | 2.234  | 10.360 | 8.127 (5)   | 0.554 | 2.025 | 1.471 (16) | 0.028 | 0.205 | 0.177 (6)  |
| Latvia         | 3.099  | 50.488 | 47.389 (28) | 0.951 | 5.062 | 4.111 (27) | 0.062 | 0.677 | 0.615 (28) |
| Malta          | 5.131  | 17.131 | 11.999 (9)  | 0.408 | 0.958 | 0.55 (5)   | 0.069 | 0.433 | 0.363 (19) |
| Malaysia       | 28.800 | 8.833  | -19.968 (1) | 3.907 | 0.588 | -3.319 (1) | 0.357 | 0.054 | -0.302 (1) |
| Netherlands    | 2.113  | 6.644  | 4.531 (3)   | 0.925 | 1.538 | 0.613 (6)  | 0.026 | 0.060 | 0.034 (2)  |
| Portugal       | 6.546  | 18.515 | 11.969 (8)  | 1.455 | 1.528 | 0.073 (3)  | 0.072 | 0.340 | 0.267 (13) |
| Romania        | 5.222  | 42.359 | 37.137 (26) | 0.486 | 3.777 | 3.29 (24)  | 0.043 | 0.422 | 0.378 (21) |
| Singapore      | 3.158  | 11.114 | 7.956 (4)   | 0.036 | 0.223 | 0.187 (4)  | 0.001 | 0.039 | 0.038 (3)  |
| Serbia         | 18.987 | 47.748 | 28.76 (22)  | 0.877 | 1.870 | 0.993 (12) | 0.164 | 0.628 | 0.464 (24) |
| Slovakia       | 1.503  | 39.819 | 38.315 (27) | 0.514 | 4.510 | 3.996 (26) | 0.010 | 0.534 | 0.524 (26) |
| Slovenia       | 2.793  | 31.614 | 28.821 (23) | 0.615 | 6.627 | 6.012 (29) | 0.027 | 0.583 | 0.556 (27) |
| Sweden         | 1.580  | 15.068 | 13.488 (11) | 0.263 | 1.024 | 0.761 (10) | 0.011 | 0.279 | 0.268 (14) |
| United States  | 12.456 | 34.210 | 21.754 (17) | 3.263 | 6.297 | 3.034 (22) | 0.134 | 0.632 | 0.498 (25) |

Green: Tertile 1 (Low score)-Good performance; Grey: Tertile 2(Medium score) – Medium performance; Orange: Tertile 3 (High score)-Poor performance

<sup>a</sup> The change of average daily hospital occupancy per 100000 inhabitants (aHOSP Change) = aHOSP of Omicron period – aHOSP of Delta period

<sup>b</sup> The change of average daily ICU occupancy per 100000 inhabitants (aICU Change) = aICU of Omicron period – aICU of Delta period

<sup>c</sup> The change of average daily mortality rate per 100000 inhabitants (aMOR Change) = aMOR of Omicron period – aMOR of Delta period
